# Supplementary material for: Recombination kinetics in a silicon solar cell at low concentration: electro-analytical characterization of space-charge and quasi-neutral regions
Source: Royal Society of Chemistry journal article supplement (doi:10.1039/c4cp01115e), 2014-01-01
Supplement: c4cp01115e1.pdf [file c4cp01115e1.pdf]

## Electronic Supplementary Information

### **Recombination kinetics in silicon solar cell under low-concentration: Electro-analytical characterization of space-charge and quasi-neutral regions**

Pankaj Yadav<sup>1</sup>, Brijesh Tripathi<sup>1,2</sup>, Kavita Pandey<sup>1</sup>, Manoj Kumar<sup>2,\*</sup>

<sup>1</sup>School of Solar Energy, Pandit Deendayal Petroleum University, Gandhinagar – 382007 (India)

<sup>2</sup>School of Technology, Pandit Deendayal Petroleum University, Gandhinagar – 382007 (India)

\*Corresponding Author: Ph: +91 79 2327 5428, Fax: +91 79 2327 5030,

Email: [manoj.kumar@sse.pdpu.ac.in](mailto:manoj.kumar@sse.pdpu.ac.in)

#### **THEORETICAL CONSIDERATION**

The n<sup>+</sup>- p junction located at  $x_j$  denoted by region 1 (see Fig. 1 of manuscript) have a total width of  $w_j$  where,  $w_j$  represents the total width of SCR. The acceptor and donor concentration of emitter and base depends on the depletion region width  $w_n$  and  $w_p$  respectively through the following equations (Eq. (1) & Eq. (2)):

$$w_n = N_a w_j / N_a + N_d \quad (1)$$

$$w_p = N_d w_j / N_a + N_d \quad (2)$$

Where  $N_a$  and  $N_d$  are the acceptor and donor concentrations, respectively. For n<sup>+</sup> emitters ( $N_d \gg N_a$ ),  $w_n \ll w_p \approx w$ .

The built in potential ( $V_{bi}$ ) at n<sup>+</sup>- p junction depends on acceptor ( $N_a$ ), donor ( $N_d$ ) and intrinsic carrier concentration ( $n_i$ ); where,  $n_i = (N_a n_{p0})^{1/2} = (N_d p_{n0})^{1/2}$ ,  $n_{p0}$  and  $p_{n0}$  denoting the minority carrier concentration in the base and emitter region, respectively [1, 2]. The built-in potential is given by Eq. (3):

$$V_{bi} = (k_B T / |e|) \ln (N_a N_d / n_i^2) \quad (3)$$

where,  $k_B$  and  $T$  represent the Boltzmann constant and cell temperature, respectively;  $e$  is the electron charge.

The hole-accumulation and hole-depletion at p-p<sup>+</sup> junction, located at  $x_0$ , sets up a back surface built-in voltage and is denoted by region 2 in Fig. 1 of manuscript. The magnitude of the built-in voltage is given as:

$$V_{b0} = (k_B T / |e|) \ln (N_a^+ / N_a) \quad (4)$$

An electric field associated with p-p<sup>+</sup> junction acts as a potential energy barrier to the minority electrons. This electric field repels electron back towards n<sup>+</sup>-p region reducing the surface recombination and increasing the cells efficiency. The same polarity of  $V_{bi}$  and  $V_{b0}$  indicates that emitter-base and p-p<sup>+</sup> junction both are in series. The above discussed regions (region 1 and 2) along with a leaky Schottky barrier formed at the back contact of aluminum [3, 4] are incorporated in the single diode model of a mono-crystalline Si solar cell (Fig. S1) [4-7]. Assuming that electrons are effectively repelled by back surface field associated with p-p<sup>+</sup> junction, the resistance  $R_{SH}$  in Fig. S1 describes the main leakage path for electrons [8] across the n<sup>+</sup>-p junction of the cell.

$I_{PH}$ ,  $I$  and  $I_{SH}$  are the light generated current, net output current and current flowing through  $R_{SH}$  of the cell respectively. The net output current ( $I$ ),  $= I_{PH} - I_d'$ . The current flowing through the p-p<sup>+</sup> junction,  $I_d' = I_d + I_{SH}$ , where  $I_d$  is the diode current through n<sup>+</sup>-p junction.

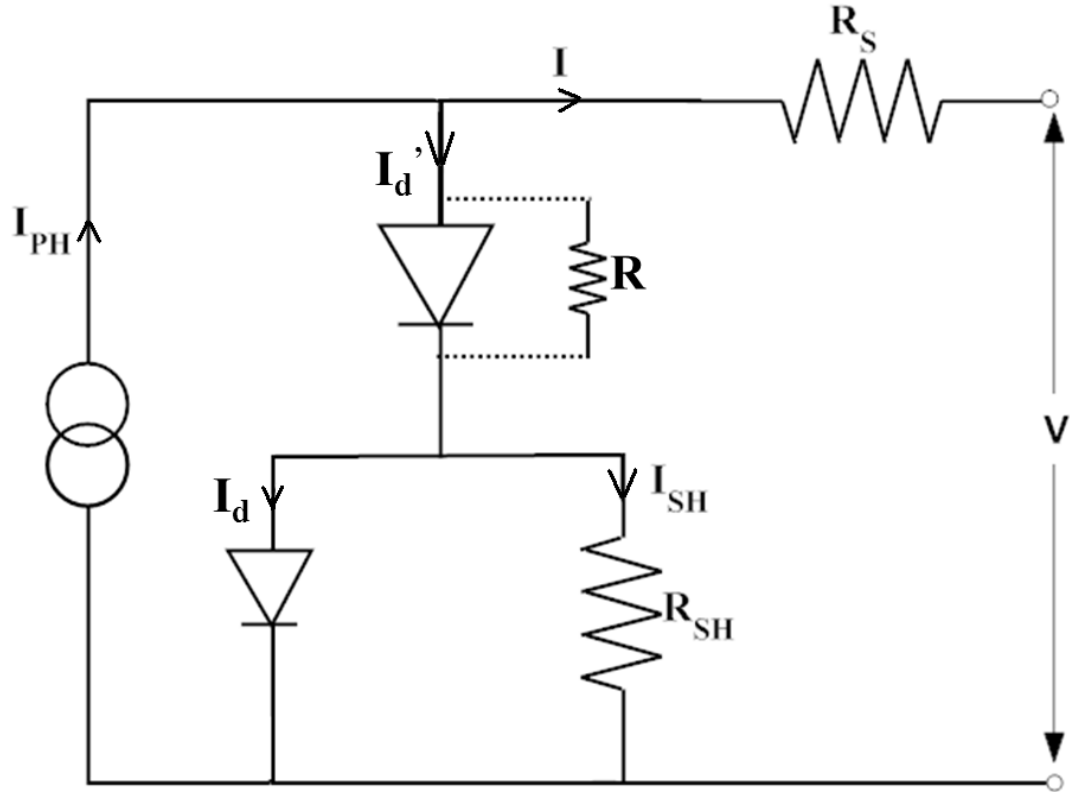

**Fig. S1** The standard single diode model of a mono-crystalline silicon solar cell

Generally, for Si solar cells  $I_{PH} \gg I_{SH}$ , so in Eq. 1 (manuscript), the small diode and ground-leakage currents can be ignored under zero-terminal voltage. Therefore the short-circuit current is approximately equal to the photocurrent. The temperature and illumination dependent expression for  $I_{PH}$  is given by Eq. (5):

$$I_{PH} = [I_{SC} + K_I(T_C - T_{Ref})]\lambda \quad (5)$$

The saturation current of a solar cell varies with the cell temperature, which is described by Eq. (6):

$$I_0 = I_{RS} \left( \frac{T_C}{T_{Ref}} \right)^3 \exp \left[ \frac{q(E_{Fn} - E_{Fp}) \left( \frac{1}{T_{Ref}} - \frac{1}{T_C} \right)}{mk_B} \right] \quad (6)$$

For the case of  $q(E_{Fn} - E_{Fp}) \approx V_{OC}$  in Eq. (6), the conditions for QNR prevail and under these conditions, the ideality factor,  $m = 1$ , otherwise, for the case of  $q(E_{Fn} - E_{Fp}) > V_{OC}$  the conditions of SCR prevail, that results in the ideality factor,  $m = 2$ . Reverse saturation current of the cell at reference temperature depends on the open-circuit voltage ( $V_{OC}$ ) and can be approximately obtained by following equation as given by Tsai et al. [9]:

$$I_{RS} = I_{SC} / [\exp(qV_{OC}/N_S k_B A T_C) - 1] \quad (7)$$

The maximum power output of LCPV cell is related to the  $I_{SC}$  and  $V_{OC}$  by following equation:

$$P_{MAX} = FF \times V_{OC} \times I_{SC} \quad (8)$$

The values of  $I_{SC}$ ,  $V_{OC}$  and  $FF$  can be determined from the I-V characteristics. The efficiency of the solar cell in relation with the  $P_{MAX}$  is given by following equation:

$$\eta = P_{MAX} / (A \times \lambda) \quad (9)$$

$A$  is the area of the solar cell and  $\lambda$  is the incident solar radiation (kW/m<sup>2</sup>).

The capacitive components of Si solar cell are represented by emitter capacitance ( $C_{de}$ ), transition capacitance ( $C_T$ ) and the base capacitance ( $C_{db}$ ). The resistive and capacitive components at p-p<sup>+</sup> interface are represented by  $R_{pp^+}$  and  $C_{pp^+}$  respectively. The total junction resistance at n<sup>+</sup>-p junction (see Fig. 1 of manuscript) is given by Eq. (10).

$$R_j = \frac{R_d R_{SH}}{R_d + R_{SH}} \quad (10)$$

where  $R_d$  is the diffusion resistance of n<sup>+</sup>-p junction. Analytical expression for diffusion resistance ( $R_d$ ) is obtained by parallel combination of the resistances offered by emitter and base junction as given by Eq. (11).

$$R_d = \frac{R_{db}R_{de}}{R_{db} + R_{de}} \quad (11)$$

Recombination properties of a solar cell can be explored by observing the variation of  $R_d$  with voltage or by comparing different solar cells having different morphology or energy band gaps. At low forward bias condition,  $R_j$  saturates to a value that might be due to the dominating shunt resistance ( $R_{SH}$ ) as a consequence of unavoidable leakage currents. Under strong forward bias or in quasi-neutral region (QNR), the last term of the denominator in Eq. 4 (manuscript) can be neglected and the total D.C. resistance reduces to Eq. (12):

$$R_{dc} = \frac{(R_d + R_s + R_{pp})}{\left[1 + I\left(\frac{\partial R_s}{\partial V}\right)\right]} \quad (12)$$

The net capacitance ( $C_j$ ) for n<sup>+</sup>-p junction is given by Eq. (13):

$$C_j = (C_T + C_d) \quad (13)$$

where,  $C_d$  represent the diffusion capacitance of n<sup>+</sup>-p junction. The relation between  $C_d$  and diffusive component of base ( $C_{db}$ ) and emitter ( $C_{de}$ ) region (see Fig. 1 of manuscript) is given by Eq. (15):

$$C_d = (C_{db} + C_{de}) \quad (14)$$

$$C_d = \frac{e^2 n_i^2}{mk_B T} \left( \frac{L_p}{N_d} + \frac{L_n}{N_a} \right) \exp\left(\frac{|e|V_j}{mk_B T}\right) \quad (15)$$

where  $L_p$  and  $L_n$  represent the diffusion length of holes and electrons respectively.

In general, diffusion capacitance (also known as chemical capacitance,  $C_\mu$ ) is governed by excess carriers and related to the change in electron occupancy of density of states ( $C_\mu = q^2 L g_n(V_F)$ ) where L is the active thickness of Si solar cell. At higher forward bias, the electron occupancy of density of states progresses leading to an increase in the value of  $C_d$ . The transition capacitance,  $C_T$  (also known as depletion-region capacitance, shown in Fig. 1 of manuscript) decreases or remains constant with increasing reverse bias which is expected since the separation of charges increase with applied bias. The voltage dependence of  $C_T$  is utilized for the extraction of built-in potential and doping density of n<sup>+</sup>-p junction. By measuring the junction capacitance ( $C_j$ ) and junction resistance ( $R_j$ ) over a voltage range, the values of  $C_T$ , and  $C_d$  as well as  $R_{SH}$  and  $R_d$  can be determined. The transition capacitance is given by Eq. (16) [10]:

$$C_T = \left( \frac{(\epsilon |e| N_a)}{2 (V_{bi} - V_j)} \right)^{1/2} \quad (16)$$

By combining these identities the minority carrier lifetime in emitter and base region of n<sup>+</sup>-p junction is determined. The effective carrier lifetime  $\tau_j$  can be given by Eq. (17):

$$\tau_j = 2 R_j C_j \quad (17)$$

The net impedance ( $Z$ ) of the equivalent circuit shown in Fig. 1 (manuscript) is a series combination of the impedances,  $Z_j$  and  $Z_{pp^+}$  of the n<sup>+</sup>-p and the p-p<sup>+</sup> junctions, respectively. The  $R_{pp^+} - C_{pp^+}$  loop will remain undetected in EIS as long as the following conditions are satisfied: (i)  $Z'_j \gg Z'_{pp^+}$ , and (ii)  $|Z''_j| \gg |Z''_{pp^+}|$ , where the primed and double primed terms represent real and imaginary impedance components respectively. Considering the individual impedance elements of Fig. 1 (manuscript), these two conditions can be written as follows [11]:

$$\frac{R_j}{1 + \left(\frac{\omega}{\omega_j}\right)^2} \gg \frac{R_{pp+}}{1 + \left(\frac{\omega}{\omega_p}\right)^2} \quad (18)$$

$$\frac{(R_j)^2 C_j}{1 + \left(\frac{\omega}{\omega_j}\right)^2} \gg \frac{(R_{pp+})^2 C_{pp+}}{1 + \left(\frac{\omega}{\omega_p}\right)^2} \quad (19)$$

$\omega_j = 1/2R_j C_j$  (for  $\omega_j \tau \ll 1$ ) is the rate constant of recombination and equivalent to the reciprocal of the electron lifetime,  $\omega$  is the angular frequency and  $i = (-1)^{1/2}$ . The carrier collection efficiency is governed by a key parameter known as diffusion length,  $L_n$ . The diffusion length is related to recombination characteristic angular frequency (i.e.  $\omega_j = D_n/L_n^2$ ).

## REFERENCES

1. I. S. Kim and M. J. Youn, *IEE Proceedings-Electric Power Applications*, 2005, 152, 953-959.
2. I. S. Kim, M. B. Kim and M. J. Youn, *IEEE Transaction on Industrial Electronics*, 2006, 53, 1027-1035.
3. A. S. H. van der Heide, A. Schönecker, J. H. Bultman and W. C. Sinke, *Progr. Photovolt.: Res. Appl.*, 2005, 13, 3-16.
4. E. Radziemska, *Energy Convers. Manage.*, 2005, 46, 1485-1494.
5. A. Goetzberger, J. Knobloch and B. Voss, *Crystalline Silicon Solar Cells*, J. Wiley, New York, 1998.
6. M. A. Green, A. W. Blakers, J. Zhao, A. M. Milne, A. Wang and X. Dai, *IEEE Trans. Electron Devices*, 1990, 37, 331-336.

7. S. W. Glunz, J. Nekarda, H. Mäckel and A. Cuevas, *Proc. 22<sup>nd</sup>European Photovoltaic Solar Energy Conference*, Milan, Italy, 3–7 September, 2007, pp. 849-853.
8. O. Breitenstein, J. P. Rakotoniaina, M. H. Rifai and M. Werner, *Progr. Photovolt.: Res. Appl.*, 2004, 12, 529-538.
9. H. L. Tsai, C. S. Tu and Y. J. Su, *Proceedings of the World Congress on Engineering and Computer Science*, October 22 - 24, San Francisco, USA, 2008.
10. S. M. Sze, *Physics of semiconductor devices*, Wiley, New York, 2nd ed., 1981.
11. J. E. Garland, D. J. Crain, J. P. Zheng, C. M. Sulyma and D. Roy, *Energy Environ. Sci.*, 2011, 4, 485-498.
